# Supplementary material for: A regional analysis of paraglacial landslide activation in southern coastal Alaska
Source: Copernicus journal article supplement (doi:10.5194/egusphere-2024-1086), 2024-05-30
Supplement: Supplementary file 1 [file supplement.pdf › supplement_sub3/supplement.pdf]

# Supplementary Material

## List of images used for terminus delineation

Table 1: List of images used for terminus delineation. “This work” provides the file name of the Landsat images delineated in this study, and “McNabb et al. (2015)” refers to the Landsat scene (lsat\_scene) given by that study.

| Glacier | Year | This work                                      | McNabb et al. (2015)  |
|---------|------|------------------------------------------------|-----------------------|
| Alsek   | 1984 | LT05.L2SP_060019_19840907_20200918_02_T1       | —                     |
|         | 1985 | LT05.L2SP_061018_19850715_20200918_02_T1_SR_B2 | —                     |
|         | 1986 | LT05.L2SP_061018_19860718_20200917_02_T1_SR_B2 | —                     |
|         | 1987 | LT05.L2SP_061019_19870822_20201014_02_T1_SR_B2 | —                     |
|         | 1988 | LT05.L2SP_061019_19880909_20200917_02_T1_SR_B2 | —                     |
|         | 1989 | LT05.L2SP_061018_19890827_20200916_02_T1_SR_B2 | —                     |
|         | 1990 | LT05.L2SP_061019_19901001_20200915_02_T1       | —                     |
|         | 1992 | LT05.L2SP_061018_19920904_20200914_02_T1_SR_B2 | —                     |
|         | 1993 | LT05.L2SP_060019_19930714_20200914_02_T1_SR_B2 | —                     |
|         | 1994 | LT05.L2SP_061018_19940809_20200913_02_T1_SR_B2 | —                     |
|         | 1995 | LT05.L2SP_061018_19951015_20200912_02_T1       | —                     |
|         | 1996 | LT05.L2SP_061019_19961017_20200911_02_T1_SR_B2 | —                     |
|         | 1998 | LT05.L2SP_061018_19980804_20200908_02_T1_SR_B2 | —                     |
|         | 1999 | LE07.L2SP_060019_19990909_20200918_02_T1_SR_B2 | —                     |
|         | 2000 | LE07.L2SP_060019_20000810_20200917_02_T1       | —                     |
|         | 2001 | LE07.L1TP_060019_20010813_20200917_02_T1_B8    | —                     |
|         | 2002 | LE07.L1TP_060019_20020731_20200916_02_T1_B8    | —                     |
|         | 2003 | LT05.L2SP_060019_20030710_20200904_02_T1_SR_B2 | —                     |
|         | 2004 | LE07.L2SP_060019_20040805_20200915_02_T1       | —                     |
|         | 2005 | LT05.L2SP_061018_20050908_20200901_02_T1_SR_B2 | —                     |
|         | 2006 | LT05.L2SP_060019_20060702_20200831_02_T1_SR_B2 | —                     |
|         | 2007 | LE07.L2SP_061018_20071008_20200913_02_T1_SR_B2 | —                     |
|         | 2008 | LT05.L2SP_061018_20080730_20200829_02_T1_SR_B2 | —                     |
|         | 2009 | LT05.L2SP_061018_20090717_20200827_02_T1_SR_B2 | —                     |
|         | 2010 | LT05.L2SP_060019_20100814_20200823_02_T1       | —                     |
|         | 2011 | LT05.L2SP_061018_20110723_20200822_02_T1_SR_B2 | —                     |
|         | 2012 | LE07.L2SP_061018_20121021_20200908_02_T1_SR_B2 | —                     |
|         | 2013 | LC08.L1TP_060019_20130806_20200912_02_T1_B8    | —                     |
|         | 2014 | LE07.L2SP_061018_20141027_20200905_02_T1       | —                     |
|         | 2015 | LC08.L1TP_060019_20150913_20200908_02_T1_B8    | —                     |
|         | 2016 | LC08.L2SP_060019_20161001_20200906_02_T1_SR_B2 | —                     |
|         | 2017 | LC08.L1TP_060019_20170918_20200903_02_T1_B8    | —                     |
|         | 2018 | LC08.L1TP_060019_20180905_20200831_02_T1_B8    | —                     |
|         | 2019 | LC08.L1TP_060019_20190908_20200826_02_T1_B8    | —                     |
|         | 2020 | LC08.L1TP_060019_20200910_20200919_02_T1_B8    | —                     |
|         | 2021 | LC08.L2SP_060019_20210929_20211013_02_T1       | —                     |
|         | 2022 | LC08.L1TP_061018_20220705_20220722_02_T1_B8    | —                     |
| Barry   | 1985 | —                                              | LM50680171985277AAA03 |
|         | 1986 | —                                              | LT50670171986289XXX03 |
|         | 1987 | —                                              | LT50670171987196XXX01 |
|         | 1989 | —                                              | LT40680181989232XXX02 |
|         | 1991 | —                                              | LT50680171991166XXX03 |
|         | 1992 | —                                              | LM40680171992273AAA03 |
|         | 1993 | —                                              | LT40680171993195XXX02 |
|         | 1994 | —                                              | LT50680171994270XXX02 |
|         | 1995 | —                                              | LT50670171995282AAA03 |
|         | 1999 | —                                              | LE70670171999269AGS00 |
|         | 2000 | —                                              | LE70670172000208AGS00 |

Table 1: List of images used for terminus delineation. “This work” provides the file name of the Landsat images delineated in this study, and “McNabb et al. (2015)” refers to the Landsat scene (lsat\_scene) given by that study.

| Glacier  | Year | This work                                      | McNabb et al. (2015)  |
|----------|------|------------------------------------------------|-----------------------|
| Barry    | 2001 | –                                              | LE70670172001258EDC00 |
|          | 2002 | –                                              | LE70670172002277EDC00 |
|          | 2003 | –                                              | LT50670172003288PAC01 |
|          | 2004 | –                                              | LT50680172004282PAC00 |
|          | 2005 | –                                              | LT50670172005261PAC01 |
|          | 2006 | –                                              | LE70680172006263EDC00 |
|          | 2007 | –                                              | LE70680172007282EDC00 |
|          | 2008 | –                                              | LE70670172008294EDC00 |
|          | 2009 | –                                              | LT50680172009215GLC00 |
|          | 2010 | –                                              | LE70670172010267EDC00 |
|          | 2011 | –                                              | LE70670172011270EDC00 |
|          | 2012 | LE07_L1TP_068017_20120718_20200908_02_T1_B2    | –                     |
|          | 2013 | LC08_L1TP_067017_20130326_20200913_02_T1_B8    | –                     |
|          | 2014 | LC08_L1TP_067017_20140826_20200911_02_T1_B8    | –                     |
|          | 2015 | LC08_L1TP_067017_20150813_20201015_02_T1_B8    | –                     |
|          | 2016 | LC08_L1TP_067017_20160831_20200906_02_T1_B8    | –                     |
|          | 2017 | LC08_L1TP_067017_20170919_20200903_02_T1_B8    | –                     |
|          | 2018 | LC08_L1TP_067017_20180720_20200831_02_T1_B8    | –                     |
|          | 2019 | LC08_L1TP_067017_20190808_20200827_02_T1_B8    | –                     |
|          | 2020 | LC08_L1TP_067017_20200911_20200919_02_T1_B8    | –                     |
|          | 2021 | LC08_L1TP_067017_20210813_20210819_02_T1_B8    | –                     |
|          | 2022 | LC08_L1TP_067017_20220731_20220805_02_T1_B8    | –                     |
| Columbia | 1985 | –                                              | LM50670171985254AAA03 |
|          | 1986 | –                                              | LT50660171986266XXX03 |
|          | 1987 | –                                              | LT50660171987237XXX01 |
|          | 1989 | –                                              | LT40680171989232XXX01 |
|          | 1991 | –                                              | LT50680171991166XXX03 |
|          | 1992 | –                                              | LM40680171992273AAA03 |
|          | 1993 | –                                              | LT40680171993195XXX02 |
|          | 1994 | –                                              | LT50660171994272XXX02 |
|          | 1995 | –                                              | LT50660171995275AAA02 |
|          | 1996 | –                                              | LT50660171996278PAC00 |
|          | 1997 | –                                              | LT50660171997280PAC00 |
|          | 1998 | –                                              | LT50660171998283PAC00 |
|          | 1999 | –                                              | LE70670171999269AGS00 |
|          | 2000 | –                                              | LE70670172000208AGS00 |
|          | 2001 | –                                              | LE70670172001258EDC00 |
|          | 2002 | –                                              | LE70670172002277EDC00 |
|          | 2003 | –                                              | LT50670172003288PAC01 |
|          | 2004 | –                                              | LT50680172004282PAC00 |
|          | 2005 | –                                              | LT50670172005261PAC01 |
|          | 2006 | –                                              | LT50660172006273PAC00 |
|          | 2007 | –                                              | LE70680172007282EDC00 |
|          | 2008 | –                                              | LE70670172008294EDC00 |
|          | 2009 | –                                              | LT50680172009215GLC00 |
|          | 2010 | –                                              | LE70670172010267EDC00 |
|          | 2011 | –                                              | LE70670172011270EDC00 |
|          | 2012 | LE07_L2SP_067017_20120828_20200908_02_T1_SR_B2 | –                     |
|          | 2013 | LC08_L1TP_067017_20130326_20200913_02_T1_B8    | –                     |
|          | 2014 | LC08_L2SP_067017_20140826_20200911_02_T1       | –                     |
|          | 2015 | LC08_L1TP_067017_20150813_20201015_02_T1_B8    | –                     |
|          | 2016 | LC08_L1TP_067017_20160831_20200906_02_T1_B8    | –                     |
| Columbia | 2017 | LC08_L1TP_067017_20170919_20200903_02_T1_B8    | –                     |

Table 1: List of images used for terminus delineation. “This work” provides the file name of the Landsat images delineated in this study, and “McNabb et al. (2015)” refers to the Landsat scene (lsat\_scene) given by that study.

| Glacier       | Year | This work                                      | McNabb et al. (2015) |
|---------------|------|------------------------------------------------|----------------------|
|               | 2018 | LC08.L1TP_067017_20180720_20200831_02_T1.B8    | –                    |
|               | 2019 | LC08.L1TP_067017_20190808_20200827_02_T1.B8    | –                    |
|               | 2020 | LC08.L1TP_067017_20200911_20200919_02_T1.B8    | –                    |
|               | 2021 | LC08.L2SP_067017_20210813_20210819_02_T1       | –                    |
|               | 2022 | LC08.L2SP_066017_20220724_20220802_02_T1_SR.B2 | –                    |
| Ellsworth     | 1985 | LT05.L2SP_068018_19851004_20200918_02_T1_SR.B2 | –                    |
|               | 1986 | LT05.L2SP_067018_19860728_20200917_02_T1_SR.B2 | –                    |
|               | 1989 | LT04.L2SP_067018_19890712_20200916_02_T1.mb    | –                    |
|               | 1992 | LT04.L2SP_068018_19920828_20200914_02_T1_SR.B2 | –                    |
|               | 1994 | LT05.L2SP_068018_19940927_20200912_02_T1_SR.B2 | –                    |
|               | 1995 | LT05.L2SP_067018_19951009_20200912_02_T1_SR.B2 | –                    |
|               | 1999 | LE07.L1TP_067018_19990926_20200918_02_T1.B8    | –                    |
|               | 2000 | LE07.L2SP_067018_20000726_20200917_02_T1_SR.B2 | –                    |
|               | 2001 | LE07.L2SP_068018_20010805_20200917_02_T1_SR.B2 | –                    |
|               | 2002 | LE07.L1TP_067018_20020902_20200916_02_T1.B8    | –                    |
|               | 2003 | LT05.L2SP_067018_20031015_20200904_02_T1_SR.B2 | –                    |
|               | 2004 | LE07.L2SP_068018_20040813_20200915_02_T1_SR.B2 | –                    |
|               | 2005 | LT05.L2SP_068018_20050808_20200902_02_T1_SR.B2 | –                    |
|               | 2006 | LT05.L2SP_068018_20060726_20200831_02_T1_SR.B2 | –                    |
|               | 2007 | LT05.L2SP_068018_20070830_20200830_02_T1_SR.B2 | –                    |
|               | 2008 | LE07.L2SP_068018_20080808_20200912_02_T1_SR.B2 | –                    |
|               | 2009 | LT05.L2SP_068018_20090803_20200827_02_T1_SR.B2 | –                    |
|               | 2010 | LT05.L2SP_067018_20100831_20200823_02_T1_SR.B2 | –                    |
|               | 2011 | LT05.L2SP_068018_20111012_20200820_02_T1_SR.B2 | –                    |
|               | 2012 | LE07.L2SP_068018_20120803_20200908_02_T1_SR.B2 | –                    |
|               | 2013 | LC08.L2SP_067018_20130823_20200912_02_T1_SR.B2 | –                    |
|               | 2014 | LC08.L1TP_067018_20140826_20200911_02_T1.B8    | –                    |
|               | 2015 | LC08.L2SP_068018_20150719_20201015_02_T1_SR.B2 | –                    |
|               | 2016 | LC08.L1TP_067018_20160831_20200906_02_T1.B8    | –                    |
|               | 2017 | LC08.L2SP_067018_20170919_20200903_02_T1_SR.B2 | –                    |
|               | 2018 | LC08.L1TP_067018_20180906_20200831_02_T1.B8    | –                    |
|               | 2019 | LC08.L1TP_067018_20190808_20200827_02_T1.B8    | –                    |
|               | 2020 | LC08.L1TP_067018_20200911_20200919_02_T1.B8    | –                    |
|               | 2021 | LC08.L1TP_067018_20210829_20210909_02_T1.B8    | –                    |
|               | 2022 | LC08.L2SP_067018_20220731_20220805_02_T1       | –                    |
| Grand Plateau | 1984 | LT05.L2SP_060019_19840907_20200918_02_T1       | –                    |
|               | 1985 | LT05.L2SP_060019_19850926_20200918_02_T1_SR.B2 | –                    |
|               | 1986 | LT05.L2SP_059019_19860821_20200917_02_T1_SR.B2 | –                    |
|               | 1987 | LT05.L2SP_061019_19870822_20201014_02_T1_SR.B2 | –                    |
|               | 1988 | LT05.L2SP_061019_19880909_20200917_02_T1_SR.B2 | –                    |
|               | 1989 | LT05.L2SP_060019_19891023_20200916_02_T1_SR.B2 | –                    |
|               | 1990 | LT05.L2SP_061019_19901001_20200915_02_T1       | –                    |
|               | 1992 | LT05.L2SP_059019_19920821_20200914_02_T1_SR.B2 | –                    |
|               | 1993 | LT05.L2SP_060019_19930714_20200914_02_T1_SR.B2 | –                    |
|               | 1994 | LT05.L2SP_059019_19941014_20200913_02_T1_SR.B2 | –                    |
|               | 1995 | LT05.L2SP_059019_19950915_20200912_02_T1       | –                    |
|               | 1996 | LT05.L2SP_061019_19961017_20200911_02_T1_SR.B2 | –                    |
|               | 1998 | LT05.L2SP_061019_19980804_20200908_02_T1_SR.B2 | –                    |
|               | 1999 | LE07.L2SP_060019_19990909_20200918_02_T1_SR.B2 | –                    |
|               | 2000 | LE07.L2SP_060019_20000810_20200917_02_T1       | –                    |
|               | 2001 | LE07.L1TP_060019_20010813_20200917_02_T1.B8    | –                    |
|               | 2002 | LE07.L2SP_059019_20020708_20200916_02_T1_SR.B2 | –                    |
|               | 2003 | LT05.L2SP_060019_20030710_20200904_02_T1_SR.B2 | –                    |

Table 1: List of images used for terminus delineation. “This work” provides the file name of the Landsat images delineated in this study, and “McNabb et al. (2015)” refers to the Landsat scene (lsat\_scene) given by that study.

| Glacier       | Year | This work                                      | McNabb et al. (2015) |
|---------------|------|------------------------------------------------|----------------------|
| Grand Plateau | 2004 | LE07.L2SP_060019_20040805_20200915_02.T1       | –                    |
|               | 2005 | LT05.L2SP_060019_20051003_20200901_02.T1_SR.B2 | –                    |
|               | 2006 | LT05.L2SP_059019_20060913_20200831_02.T1_SR.B2 | –                    |
|               | 2007 | LT05.L2SP_059019_20070815_20200830_02.T1_SR.B2 | –                    |
|               | 2009 | LT05.L2SP_059019_20090804_20200827_02.T1_SR.B2 | –                    |
|               | 2010 | LT05.L2SP_060019_20100814_20200823_02.T1.mb    | –                    |
|               | 2011 | LT05.L2SP_059019_20110927_20200820_02.T1_SR.B2 | –                    |
|               | 2012 | LE07.L2SP_061019_20121021_20200908_02.T1_SR.B2 | –                    |
|               | 2013 | LC08.L1TP_060019_20130806_20200912_02.T1.B8    | –                    |
|               | 2014 | LE07.L2SP_059019_20141013_20200905_02.T1.mb    | –                    |
|               | 2015 | LC08.L1TP_060019_20150913_20200908_02.T1.B8    | –                    |
|               | 2016 | LC08.L2SP_060019_20161001_20200906_02.T1_SR.B2 | –                    |
|               | 2017 | LC08.L1TP_060019_20170918_20200903_02.T1.B8    | –                    |
|               | 2018 | LC08.L1TP_060019_20180905_20200831_02.T1.B8    | –                    |
|               | 2019 | LC08.L1TP_060019_20190908_20200826_02.T1.B8    | –                    |
|               | 2020 | LC08.L2SP_059019_20200701_20200913_02.T1_SR.B2 | –                    |
|               | 2022 | LC08.L2SP_060019_20220916_20220922_02.T1_SR.B2 | –                    |
| Portage       | 1985 | LT05.L2SP_061018_19850715_20200918_02.T1       | –                    |
|               | 1986 | LT05.L2SP_067018_19860728_20200917_02.T1_SR.B2 | –                    |
|               | 1989 | LT04.L2SP_068018_19890804_20200916_02.T1       | –                    |
|               | 1994 | LT05.L2SP_068017_19940927_20200912_02.T1       | –                    |
|               | 1999 | LE07.L1TP_067018_19990926_20200918_02.T1.B8    | –                    |
|               | 2000 | LE07.L2SP_067018_20000811_20200917_02.T1       | –                    |
|               | 2001 | LE07.L2SP_068018_20010821_20200917_02.T1_SR.B2 | –                    |
|               | 2002 | LE07.L1TP_067018_20020902_20200916_02.T1.B8    | –                    |
|               | 2003 | LT05.L2SP_069017_20030927_20200904_02.T1_SR.B2 | –                    |
|               | 2004 | LE07.L2SP_068018_20040813_20200915_02.T1_SR.B2 | –                    |
|               | 2005 | LT05.L2SP_068018_20050808_20200902_02.T1       | –                    |
|               | 2006 | LT05.L2SP_068018_20060726_20200831_02.T1_SR.B2 | –                    |
|               | 2007 | LT05.L2SP_069017_20070906_20200829_02.T1_SR.B2 | –                    |
|               | 2008 | LE07.L2SP_068018_20080808_20200912_02.T1_SR.B2 | –                    |
|               | 2009 | LT05.L2SP_068018_20090803_20200827_02.T1_SR.B2 | –                    |
|               | 2010 | LT05.L2SP_068017_20100923_20200823_02.T1       | –                    |
|               | 2011 | LT05.L2SP_068018_20110926_20200820_02.T1_SR.B2 | –                    |
|               | 2012 | LE07.L2SP_068018_20120803_20200908_02.T1_SR.B2 | –                    |
|               | 2013 | LC08.L2SP_067018_20130823_20200912_02.T1_SR.B2 | –                    |
|               | 2014 | LE07.L2SP_068018_20140926_20200905_02.T1       | –                    |
|               | 2015 | LC08.L2SP_068018_20150719_20201015_02.T1_SR.B2 | –                    |
|               | 2016 | LC08.L1TP_067018_20160831_20200906_02.T1.B8    | –                    |
|               | 2017 | LC08.L1TP_068017_20170926_20200903_02.T1.B8    | –                    |
|               | 2018 | LC08.L1TP_069017_20180702_20200831_02.T1.B8    | –                    |
|               | 2019 | LC08.L1TP_067018_20190808_20200827_02.T1.B8    | –                    |
|               | 2020 | LC08.L1TP_067018_20200911_20200919_02.T1.B8    | –                    |
| Portage       | 2021 | LC08.L2SP_067018_20210829_20210909_02.T1       | –                    |
|               | 2022 | LC08.L1TP_069017_20221001_20221005_02.T1.B8    | –                    |
|               | 1984 | LT05.L2SP_063018_19840912_20200918_02.T1       | –                    |
|               | 1986 | LT05.L2SP_062018_19860911_20200917_02.T1_SR.B2 | –                    |
|               | 1987 | LT05.L2SP_062018_19870829_20201015_02.T1_SR.B2 | –                    |
|               | 1988 | LT04.L2SP_062018_19880823_20200917_02.T1_SR.B2 | –                    |
|               | 1990 | LT05.L2SP_063018_19900812_20200915_02.T1       | –                    |
|               | 1991 | LT05.L2SP_063018_19910714_20200915_02.T1_SR.B2 | –                    |
|               | 1992 | LT05.L2SP_062018_19920810_20200914_02.T1_SR.B2 | –                    |
|               | 1993 | LT05.L2SP_062018_19930728_20200913_02.T1_SR.B2 | –                    |



Table 1: List of images used for terminus delineation. “This work” provides the file name of the Landsat images delineated in this study, and “McNabb et al. (2015)” refers to the Landsat scene (lsat\_scene) given by that study.

| Glacier | Year | This work                                      | McNabb et al. (2015)  |
|---------|------|------------------------------------------------|-----------------------|
|         | 1994 | LT05_L2SP_062018_19940731_20200913_02_T1_SR_B2 | –                     |
|         | 1995 | LT05_L2SP_062018_19950904_20200912_02_T1       | –                     |
|         | 1996 | LT05_L2SP_062018_19960906_20200911_02_T1_SR_B2 | –                     |
|         | 1997 | LT05_L2SP_063018_19970916_20200909_02_T1_SR_B2 | –                     |
|         | 1998 | LT05_L2SP_062018_19981030_20200908_02_T1_SR_B2 | –                     |
|         | 1999 | LE07_L1TP_063018_19990728_20200918_02_T1_B8    | –                     |
|         | 2000 | LE07_L2SP_062018_20000909_20200917_02_T1       | –                     |
|         | 2001 | LE07_L1TP_063018_20010802_20200917_02_T1_B8    | –                     |
|         | 2002 | LE07_L1TP_063018_20020805_20200916_02_T1_B8    | –                     |
|         | 2003 | LT05_L2SP_062018_20030926_20200904_02_T1_SR_B2 | –                     |
|         | 2004 | LE07_L2SP_063018_20040911_20200915_02_T1_SR_B2 | –                     |
|         | 2005 | LT05_L2SP_062018_20050814_20200902_02_T1       | –                     |
|         | 2006 | LT05_L2SP_063018_20060925_20200831_02_T1_SR_B2 | –                     |
|         | 2007 | LT05_L2SP_063018_20070811_20200829_02_T1_SR_B2 | –                     |
|         | 2008 | LT05_L2SP_063018_20080712_20200829_02_T1_SR_B2 | –                     |
|         | 2009 | LT05_L2SP_062018_20090708_20200827_02_T1_SR_B2 | –                     |
|         | 2010 | LT05_L2SP_063018_20100920_20200823_02_T1       | –                     |
|         | 2011 | LT05_L2SP_063018_20111009_20200820_02_T1_SR_B2 | –                     |
|         | 2012 | LE07_L2SP_063018_20121019_20200908_02_T1_SR_B2 | –                     |
|         | 2013 | LC08_L1TP_063018_20130811_20200912_02_T1_B8    | –                     |
|         | 2014 | LE07_L2SP_063018_20140923_20200905_02_T1       | –                     |
|         | 2015 | LC08_L1TP_063018_20150902_20200908_02_T1_B8    | –                     |
|         | 2016 | LC08_L1TP_063018_20160904_20200906_02_T1_B8    | –                     |
|         | 2017 | LC08_L1TP_062018_20170730_20200903_02_T1_B8    | –                     |
|         | 2018 | LC08_L1TP_063018_20180926_20200830_02_T1_B8    | –                     |
|         | 2019 | LC08_L1TP_062018_20190906_20200827_02_T1_B8    | –                     |
|         | 2020 | LC08_L1TP_063018_20200729_20200908_02_T1_B8    | –                     |
|         | 2021 | LC08_L2SP_063018_20210801_20210810_02_T1       | –                     |
|         | 2022 | LC09_L1TP_062018_20220906_20220906_02_T1_B8    | –                     |
| Yale    | 1985 | –                                              | LM50680171985277AAA03 |
|         | 1986 | –                                              | LT50660171986266XXX03 |
|         | 1987 | –                                              | LT50670171987196XXX01 |
|         | 1989 | –                                              | LT40680181989232XXX02 |
|         | 1991 | –                                              | LT50680171991166XXX03 |
|         | 1993 | –                                              | LT40680171993195XXX02 |
|         | 1994 | –                                              | LT50660171994272XXX02 |
|         | 1995 | LT05_L2SP_067017_19950721_20200912_02_T1       | –                     |
|         | 1999 | –                                              | LE70670171999269AGS00 |
|         | 2000 | –                                              | LE70670172000208AGS00 |
|         | 2001 | –                                              | LE70670172001258EDC00 |
|         | 2002 | –                                              | LE70670172002277EDC00 |
|         | 2003 | –                                              | LT50670172003256PAC01 |
|         | 2004 | –                                              | LT50680172004282PAC00 |
|         | 2005 | –                                              | LT50670172005261PAC01 |
|         | 2006 | –                                              | LE70670172006256EDC00 |
|         | 2007 | –                                              | LE70680172007282EDC00 |
|         | 2008 | –                                              | LE70660172008271EDC00 |
|         | 2009 | –                                              | LT50680172009215GLC00 |
|         | 2010 | –                                              | LE70670172010267EDC00 |
|         | 2011 | –                                              | LE70670172011270EDC00 |
|         | 2012 | LE07_L1TP_068017_20120718_20200908_02_T1_B2    | –                     |
|         | 2013 | LC08_L1TP_067017_20130326_20200913_02_T1_B8    | –                     |
|         | 2014 | LC08_L2SP_067017_20140826_20200911_02_T1       | –                     |
| Yale    |      |                                                |                       |

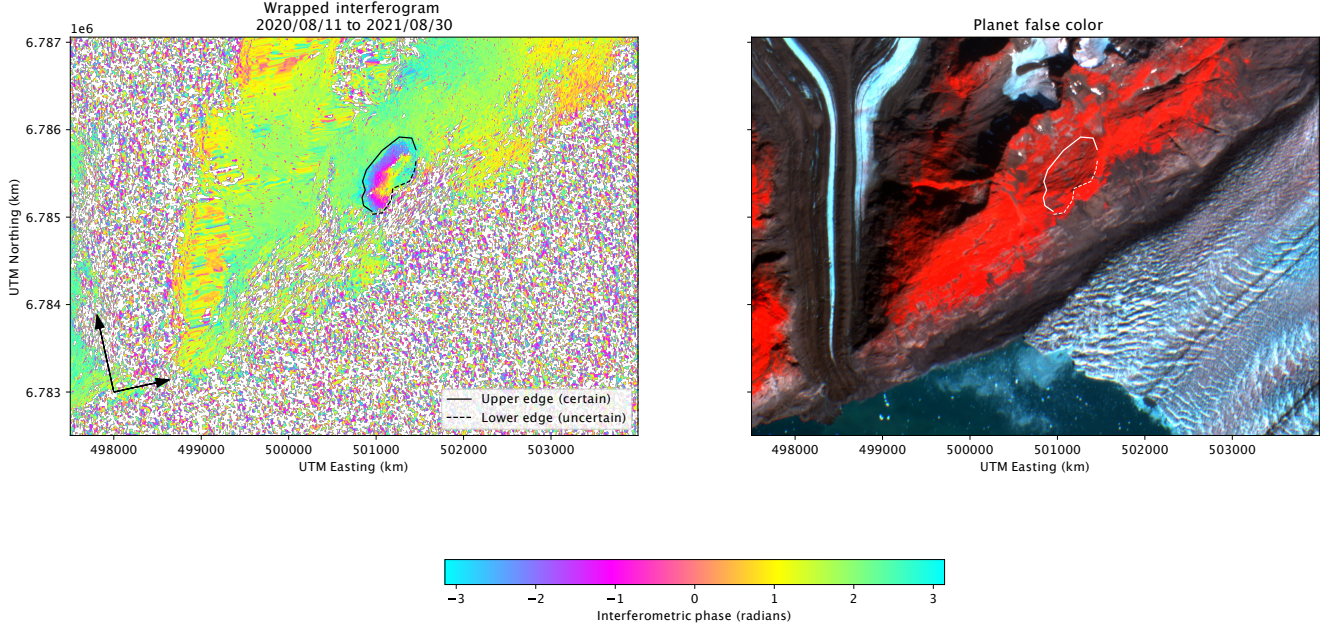

Figure 1: Data snapshot of the movement at Columbia Glacier. Interferogram at Columbia Glacier (left) shows movement over an approximately 1 year time period. A false color image (right) from Planet Labs PBC serves as a visual reference. Note the landslide outline showed in both images differs slightly from the one used in this work.

Table 1: List of images used for terminus delineation. “This work” provides the file name of the Landsat images delineated in this study, and “McNabb et al. (2015)” refers to the Landsat scene (lsat\_scene) given by that study.

| Glacier | Year | This work                                      | McNabb et al. (2015) |
|---------|------|------------------------------------------------|----------------------|
|         | 2015 | LC08_L1TP_067017_20150813_20201015_02_T1_B8    | —                    |
|         | 2016 | LC08_L1TP_067017_20160831_20200906_02_T1_B8    | —                    |
|         | 2017 | LC08_L1TP_067017_20170919_20200903_02_T1_B8    | —                    |
|         | 2018 | LC08_L1TP_067017_20180720_20200831_02_T1_B8    | —                    |
|         | 2019 | LC08_L1TP_067017_20190808_20200827_02_T1_B8    | —                    |
|         | 2020 | LC08_L1TP_067017_20200911_20200919_02_T1_B8    | —                    |
|         | 2021 | LC08_L2SP_067017_20210813_20210819_02_T1       | —                    |
|         | 2022 | LC08_L2SP_068017_20220706_20220722_02_T1_SR_B2 | —                    |

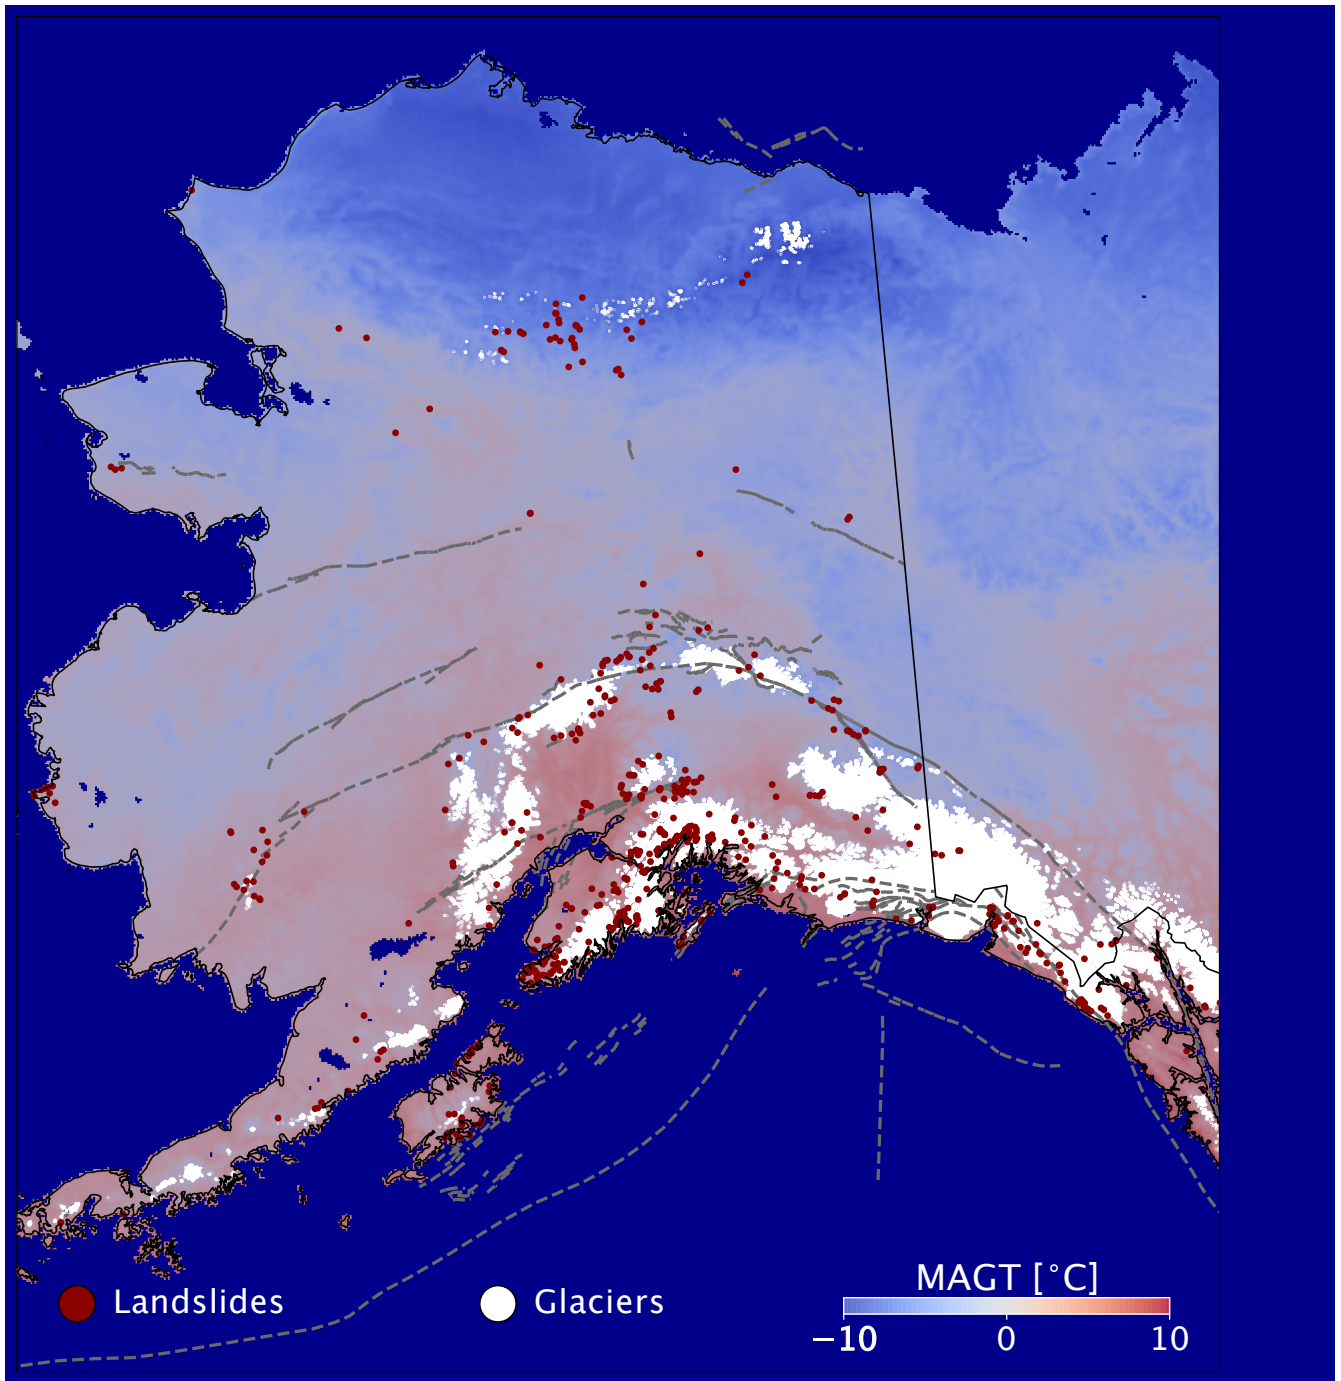

Figure 2: Larger version of Figure 1e. Overview of the sites of interest. Ocean area (dark blue) is from © OpenStreetMap contributors 2024. Distributed under the Open Data Commons Open Database License (ODbL) v1.0. Mean annual ground temperature (MAGT) (Obu et al., 2018), along with all sites from Higman (2022) (red dots), the glacierized area from RGI Consortium (2017) (white area), and faults from U.S. Geological Survey and Alaska Department of Natural Resources (2024) (gray dashed lines).
