# Supplementary material for: A regional analysis of paraglacial landslide activation in southern coastal Alaska
Source: Copernicus journal article supplement (doi:10.5194/egusphere-2024-1086), 2024-05-30
Supplement: Supplementary file 2 [file egusphere-2024-1086-supplement.zip]

## Supplementary Information for Videos

Title: A regional analysis of paraglacial landslide activation in southern coastal Alaska

Number: EGUSPHERE-2024-1086

Videos were created using Landsat 4-8 imagery courtesy of the U.S. Geological Survey.
